# Supplementary material
Source: HighWire-hosted journal article supplement (https://jmg.bmj.com/content/56/8/526)
Supplement: inline-supplementary-material-2 [file inline-supplementary-material-2.docx]

Supplementary Table S3: Validation of copy number variations by quantitative PCR

| Patient | Relative concentration | | Ratio | Conclusion |
| --- | --- | --- | --- | --- |
| chr9:35773579_35778787 | *ADORA2B* |
| IS/0101 | 1.103 | 1.701 | 0.648 | Deletion |
| Cxx | 2.708 | 1.949 | 1.389 |  |
|  |  |  |  |  |
| Patient | Relative concentration | | Ratio | Conclusion |
| chr17:44136041-44139520 | *ADORA2B* |
| IS/0101 | 1.124 | 1.713 | 0.656 | Deletion |
| Cxx | 1.771 | 1.725 | 1.027 |  |
|  |  |  |  |  |
| Patient | Relative Concentration | | Ratio | Conclusion |
| chr3:75494494_75498225 | *ADORA2B* |
| IL/1901 | 8.152 | 13.414 | 0.608 | Deletion |
| Cxy | 3.725 | 3.901 | 0.955 |  |
|  |  |  |  |  |
| Patient | Relative concentration | | Ratio | Conclusion |
| chr3:179816182_179818874 | *ADORA2B* |
| LV/1701 | 0.882 | 1.575 | 0.560 | Deletion |
| Cxx | 2.052 | 1.949 | 1.053 |  |
|  |  |  |  |  |
| Patient | Relative concentration | | Ratio | Conclusion |
| chr8:55047729_55052711 | *ADORA2B* |
| LF/2002 | 1.459 | 2.682 | 0.544 | Deletion |
| Cxx | 1.7784 | 1.885 | 0.943 |  |
|  |  |  |  |  |
| Patient | Relative concentration | | Ratio | Conclusion |
| chr1:89475928_89478645 | *ADORA2B* |
| MD/2203 | 1.483 | 3.070 | 0.483 | Deletion |
| Cxx | 1.801 | 1.834 | 0.981 |  |
|  |  |  |  |  |
| Patient | Relative concentration | | Ratio | Conclusion |
| chr1:89479919_89497087 | *ADORA2B* |
| MD/2203 | 1.433 | 3.509 | 0.408 | Deletion |
| Cxx | 1.989 | 1.866 | 1.066 |  |
|  |  |  |  |  |
| Patient | Relative concentration | | Ratio | Conclusion |
| chr1:90920858_90924676 | *ADORA2B* |
| MD/2203 | 1.466 | 3.509 | 0.417 | Deletion |
| Cxx | 1.750 | 1.866 | 0.937 |  |
|  |  |  |  |  |
| Patient | Relative concentration | | Ratio | Conclusion |
| chr15:99757847_99763974 | *ADORA2B* |
| CF/2304 | 0.416 | 0.905 | 0.459 | Deletion |
| Cxy | 1.480 | 1.512 | 0.978 |  |
|  |  |  |  |  |
| Patient | Relative concentration | | Ratio | Conclusion |
| chr15:99781580_99783832 | *ADORA2B* |
| CF/2304 | 0.445 | 0.905 | 0.491 | Deletion |
| Cxy | 1.627 | 1.512 | 1.076 |  |
|  |  |  |  |  |
| Patient | Relative concentration | | Ratio | Conclusion |
| chr8:80741443_80754254 | *ADORA2B* |
| KT/1403 | 1.126 | 2.693 | 0.4183 | Deletion |
| Cxy | 1.487 | 1.599 | 0.929 |  |
|  |  |  |  |  |
| Patient | Relative concentration | | Ratio | Conclusion |
| chrX:151730337_151756693 | *ADORA2B* |
| MD/0110 | 1.241 | 1.396 | 0.889 | Deletion (mosaic) |
| Cxx | 1.732 | 1.710 | 1.013 |  |
|  |  |  |  |  |
| Patient | Relative concentration | | Ratio | Conclusion |
| chr18:20256560_20185222 | *ADORA2B* |
| MD/0110 | 1.788 | 1.396 | 1.28 | Gain (mosaic) |
| Cxx | 1.682 | 1.710 | 0.983 |  |
|  |  |  |  |  |
| Patient | Relative concentration | | Ratio | Conclusion |
| chr7:93672128_93676082 | *ADORA2B* |
| AB/2404 | 0.61 | 1.227 | 0.497 | Deletion |
| Cxx | 1.698 | 1.663 | 1.021 |  |
|  |  |  |  |  |
| Patient | Relative concentration | | Ratio | Conclusion |
| chr18:52640089_52643123 | *ADORA2B* |
| AB/2404 | 0.685 | 1.227 | 0.558 | Deletion |
| Cxx | 1.494 | 1.663 | 0.898 |  |
|  |  |  |  |  |

Cxx: female control; Cxy: male control
