# Supplementary material
Source: HighWire-hosted journal article supplement (https://jmg.bmj.com/content/56/8/526)
Supplement: inline-supplementary-material-5 [file inline-supplementary-material-5.pdf]

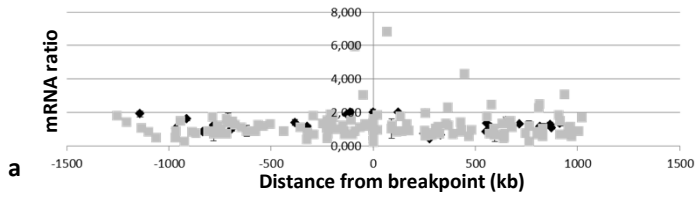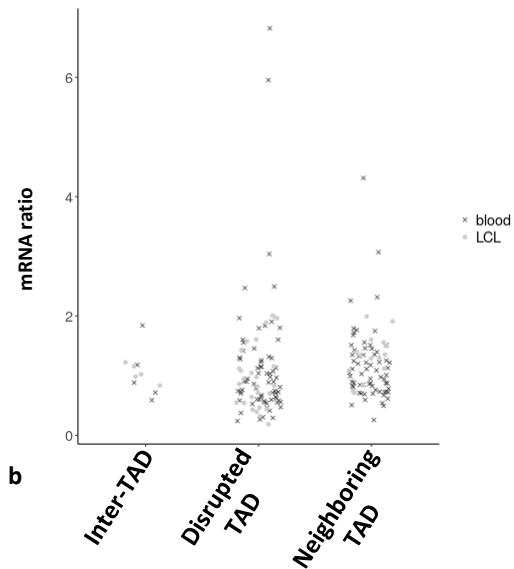

Supplementary Figure S5 : functional consequences of SV: a) relationship between gene expression (mRNA ratio) and distance from breakpoints (kb); b) relationship between gene expression (mRNA ratio) and TAD disruption: gene in inter-TAD region; gene in a disrupted TAD; gene in a TAD neighboring the breakpoint.
